# Supplementary material for: Investigation of Exomic Variants Associated with Overall Survival in Ovarian Cancer
Source: Oxford University Press journal article supplement (doi:10.1158/1055-9965.epi-15-0240), 2016-01-08
Supplement: 10559965epi150240-sup-145986_2_supp_3168555_nvjvs7.docx [file 10559965epi150240-sup-145986_2_supp_3168555_nvjvs7.docx]

**Supplemental Figure Legends**

**Supplemental Figure S1:** Minor allele frequency distribution for the meta-analyzed variants in both Set 1 and Set 2, by functional category.

**Supplemental Figure S2**: Manhattan plot of the results of the single variant analysis for Set 1. Survival analysis was adjusted for age, stage, grade, histology, site and PCs.

**Supplemental Figure S3:** Kaplan-Meier plot based on rs7642051 genotype for Set 1.

**Supplemental Figure S4:** Locus zoom plot of the –log10(p-values) for variants in the intergenic region between *UBE2U* and *CACHD1*; map of the gene region is plotted below. Color indicates degree of correlation (R2) with the most associated variant. Analysis is based on the single variant analysis of Set 1, adjusted for age, stage, grade, histology, site and PCs.

**Supplemental Figure S5:** Locus zoom plot of the –log10(p-values) based on the single variant meta-analysis for variants in the *ATG2B* region; map of the gene region is plotted below. Color indicates degree of correlation (R2) with the most associated variant. Analyses are adjusted for age, site and PCs.

**Supplemental Figure S6:** Manhattan plot of the results of the gene-level EOC survival analysis for Set 1, adjusted for age, stage, grade, histology, site and PCs. A. Burden test. B. SKAT
